# Supplementary material
Source: publisher figshare collection journal article supplement (https://acs.figshare.com/ndownloader/files/4280134)
Supplement: Supplementary file 1 [file 4280134]

## **Supporting Information**

### **Effects of Metal Ions and Ligand Functionalization on Hydrogen Storage in Metal-Organic Frameworks by Spillover**

Wenxiu Cao, Yingwei Li,\* Liming Wang,\* and Shijun Liao

Key Lab for Fuel Cell Technology of Guangdong Province, School of Chemistry and Chemical Engineering, South China University of Technology, Guangzhou 510640, China.

E-mail: liyw@scut.edu.cn

**Table S1.** H<sub>2</sub> Uptakes at 298 K and 7.3 MPa for the MIL-53 (Al, Cr, or Fe) and MIL-68 (V) materials.

| MOF         | Formula unit | Formula weight (g/mol) | Expected H <sub>2</sub> capacity, $q_e$ (wt%) <sup>a</sup> | Net H <sub>2</sub> uptake by spillover, $q_n$ (wt%) <sup>b</sup> | Enhancement factor |
|-------------|--------------|------------------------|------------------------------------------------------------|------------------------------------------------------------------|--------------------|
| MIL-53 (Al) | Al(OH)(BDC)  | 208                    | 0.18                                                       | 0.23                                                             | 2.25               |
| MIL-53 (Cr) | Cr(OH)(BDC)  | 233                    | 0.18                                                       | 0.20                                                             | 2.09               |
| MIL-53 (Fe) | Fe(OH)(BDC)  | 237                    | 0.16                                                       | 0.20                                                             | 2.26               |
| MIL-68 (V)  | V(OH)(BDC)   | 232                    | 0.20                                                       | 0.20                                                             | 2.00               |

<sup>a</sup> Based on the weighted average of the Pt/C-MOF mixture assuming no spillover.  $q_e = 0.9 \times q_{\text{mof}} + 0.1 \times q_{\text{catalyst}}$ ,  $q_{\text{mof}}$ , and  $q_{\text{catalyst}}$  are the H<sub>2</sub> uptakes of pristine MOF, and catalyst, respectively. <sup>b</sup> The net spillover enhancement for the Pt/C-MOF mixture over the expected H<sub>2</sub> uptake ( $q_n = q - q_e$ , here  $q$  is the total H<sub>2</sub> uptake measured on the Pt/C-MOF mixture).

**Table S2.** H<sub>2</sub> Uptakes at 298 K and 7.3 MPa for the IRMOF type materials.

| MOF          | Formula unit                                          | Formula weight (g/mol) | Expected H <sub>2</sub> capacity, $q_e$ (wt%) <sup>a</sup> | Net H <sub>2</sub> uptake by spillover, $q_n$ (wt%) <sup>b</sup> | Enhancement factor | H <sub>s</sub> /(x-BDC) <sup>c</sup> |
|--------------|-------------------------------------------------------|------------------------|------------------------------------------------------------|------------------------------------------------------------------|--------------------|--------------------------------------|
| IRMOF-1      | Zn <sub>4</sub> O(BDC) <sub>3</sub>                   | 770                    | 0.28                                                       | 0.27                                                             | 1.96               | 0.69                                 |
| IRMOF-2      | Zn <sub>4</sub> O(Br-BDC) <sub>3</sub>                | 1006                   | 0.25                                                       | 0.51                                                             | 3.00               | 1.89                                 |
| MTV-MOF-5-AE | Zn <sub>4</sub> O(BDC) <sub>2.1</sub>                 | 810                    | 0.25                                                       | 0.34                                                             | 2.37               | 1.43 <sup>d</sup>                    |
|              | (NO <sub>2</sub> -BDC) <sub>0.9</sub>                 |                        |                                                            |                                                                  |                    |                                      |
| IRMOF-3      | Zn <sub>4</sub> O(NH <sub>2</sub> -BDC) <sub>3</sub>  | 815                    | 0.29                                                       | 0.17                                                             | 1.60               | 0.51                                 |
| MTV-MOF-5-AF | Zn <sub>4</sub> O(BDC) <sub>1.3</sub>                 | 817                    | 0.23                                                       | 0.15                                                             | 1.67               | 0.29 <sup>e</sup>                    |
|              | ((CH <sub>3</sub> ) <sub>2</sub> -BDC) <sub>1.7</sub> |                        |                                                            |                                                                  |                    |                                      |

<sup>a</sup> Based on the weighted average of the Pt/C-MOF mixture assuming no spillover.  $q_e = 0.9 \times q_{\text{mof}} + 0.1 \times q_{\text{catalyst}}$ ,  $q_{\text{mof}}$ , and  $q_{\text{catalyst}}$  are the H<sub>2</sub> uptakes of pristine MOF, and catalyst, respectively. <sup>b</sup> The net spillover enhancement for the Pt/C-MOF mixture over the expected H<sub>2</sub> uptake ( $q_n = q - q_e$ , here  $q$  is the total H<sub>2</sub> uptake measured on the Pt/C-MOF mixture). <sup>c</sup> Average amount of H<sub>s</sub> per BDC linker. <sup>d</sup> H<sub>s</sub>/(NO<sub>2</sub>-BDC). <sup>e</sup> H<sub>s</sub>/((CH<sub>3</sub>)<sub>2</sub>-BDC).

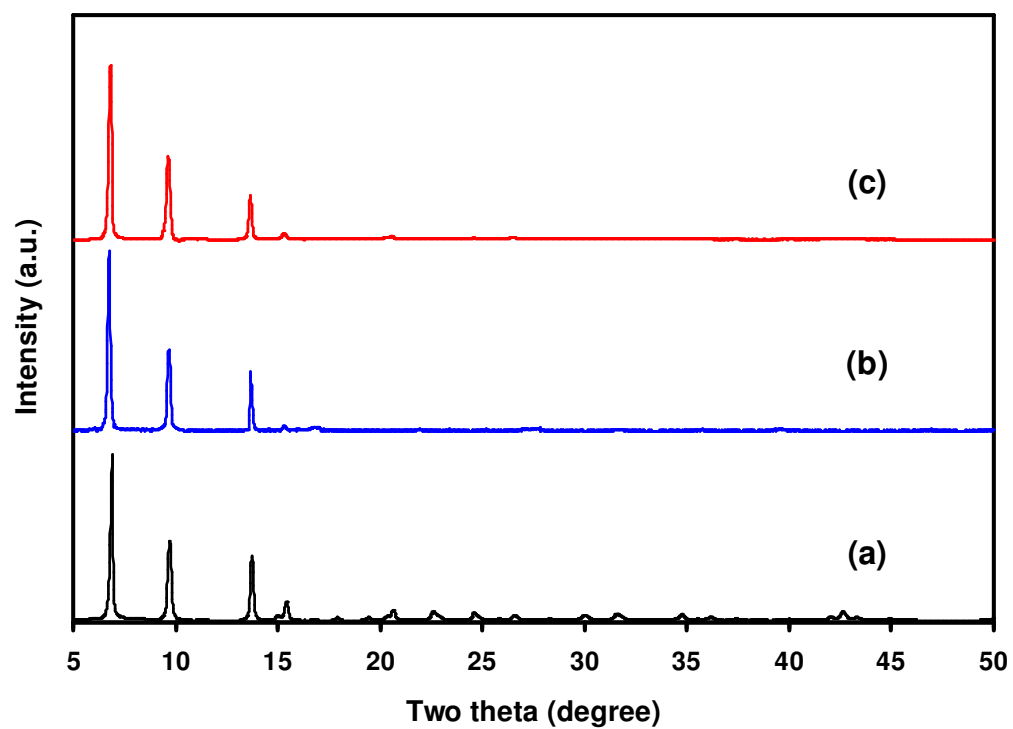

**Figure S1.** Powder XRD patterns of IRMOF-3 samples: (a) pristine IRMOF-3; (b) Pt/C-IRMOF-3 physical mixture; (c) Pt/C-IRMOF-3 after H<sub>2</sub> exposure.

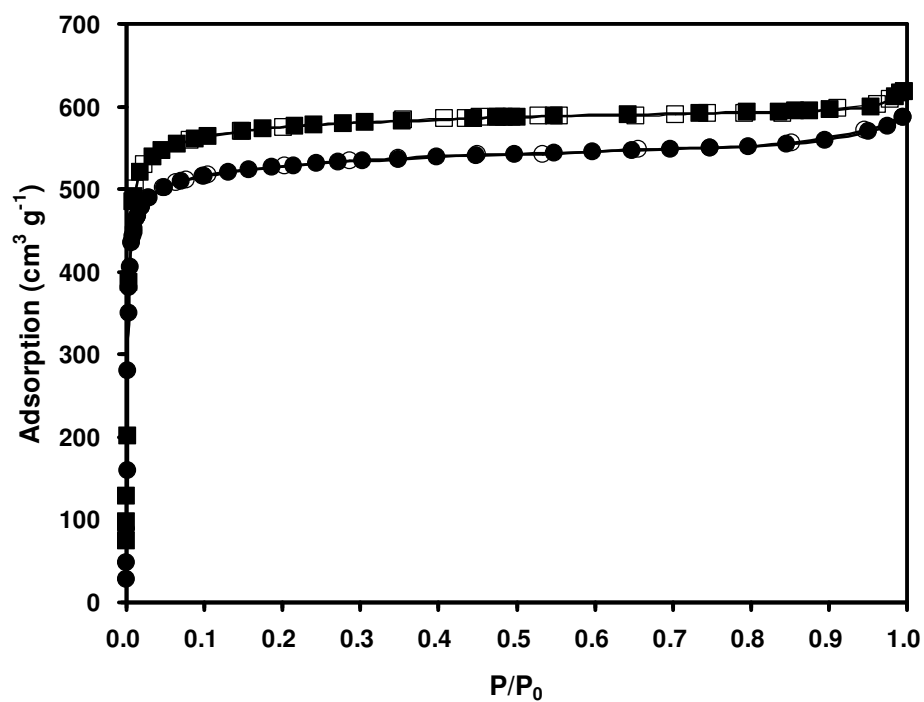

**Figure S2.** Nitrogen adsorption isotherms for IRMOF-3 at 77 K. Symbols: ■ pristine IRMOF-3; ● Pt/C-IRMOF-3 physical mixture. Open symbols indicate desorption branches. The BET surface area of the Pt/C-IRMOF-3 mixture is ca. 2015 m<sup>2</sup>/g.

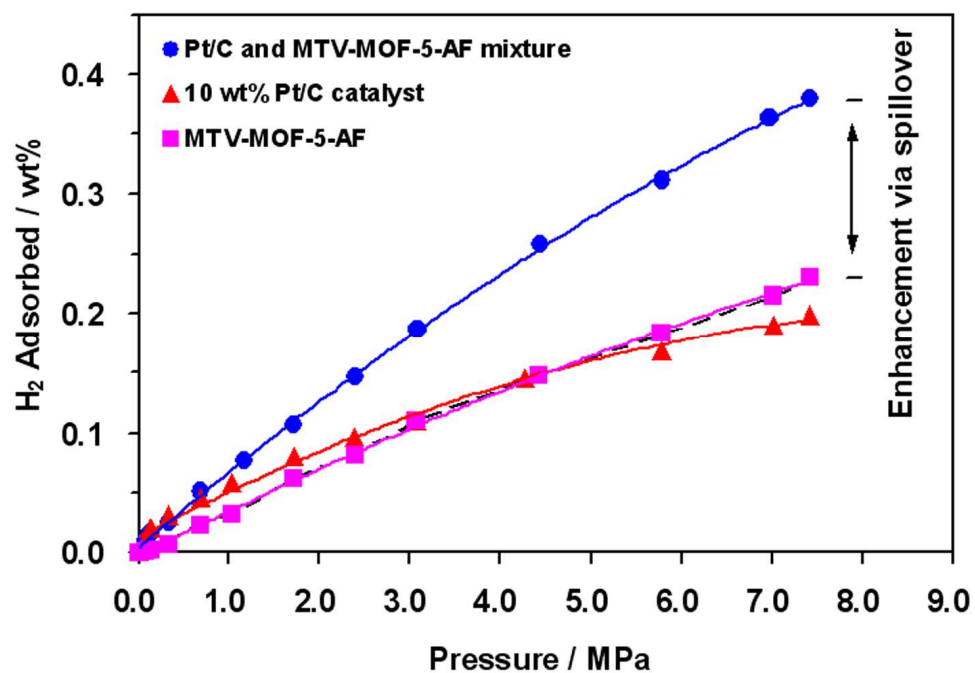

**Figure S3.** High-pressure hydrogen adsorption at 298 K for the MTV-MOF-5-AF. Dotted line is prediction based on the weighted average of the mixture.

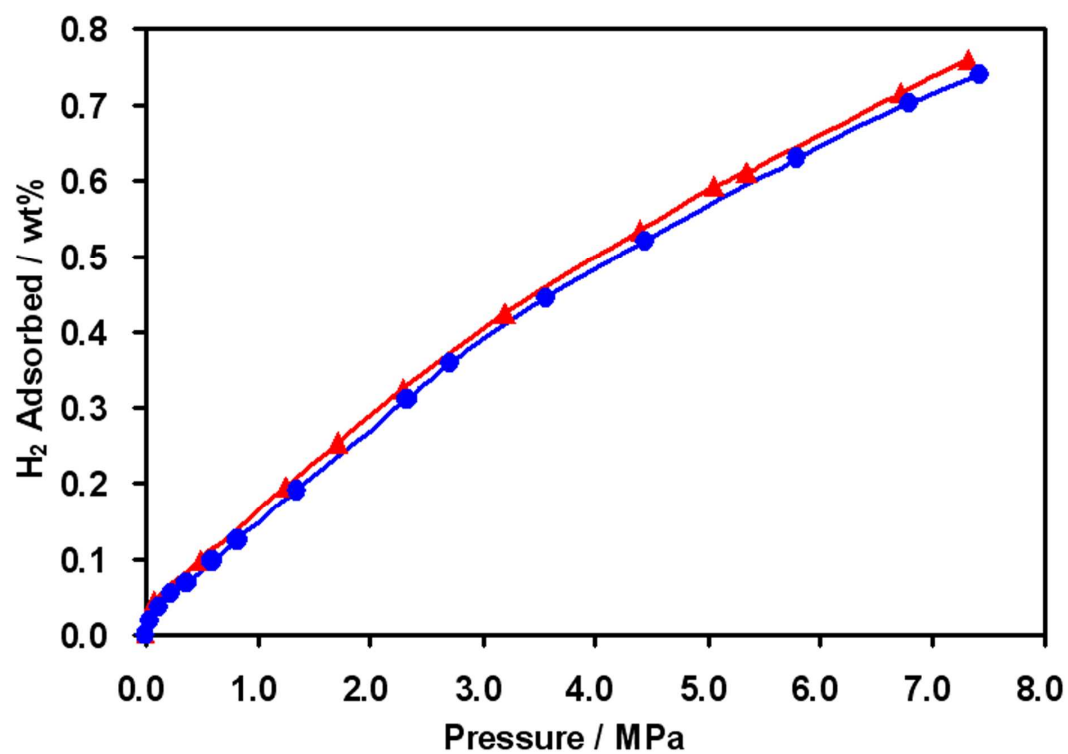

**Figure S4.** High-pressure hydrogen isotherms at 298 K for two Pt/C–IRMOF-2 physical mixtures prepared independently.

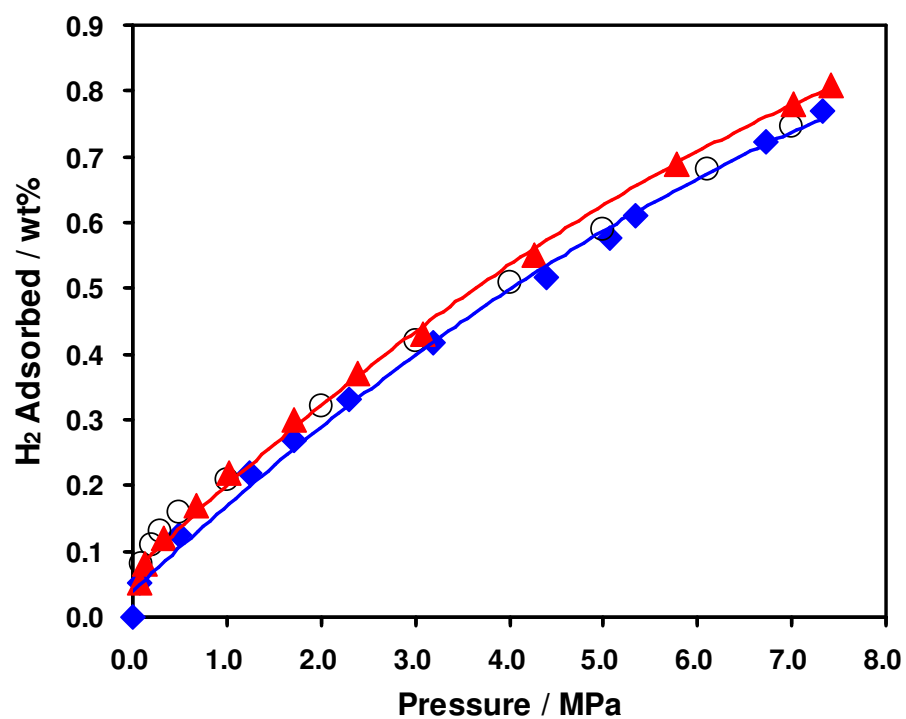

**Figure S5.** High-pressure hydrogen adsorption at 298 K for the Pt/C-IRMOF-2 physical mixture: first adsorption (◆), desorption (○), and second adsorption (▲).
